# Supplementary material
Source: ML conference proceedings conference paper supplement (https://openreview.net/forum?id=Qfa5pMW8nCJ)

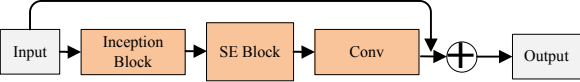

Supplement: supplementary_material [file attachment]

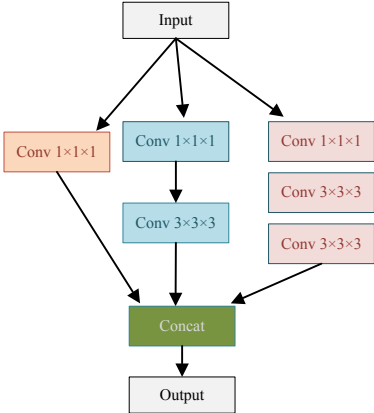

(a) Inception block

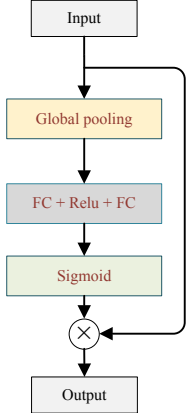

(b) SE block

Supplement: supplementary_material [file attachment]

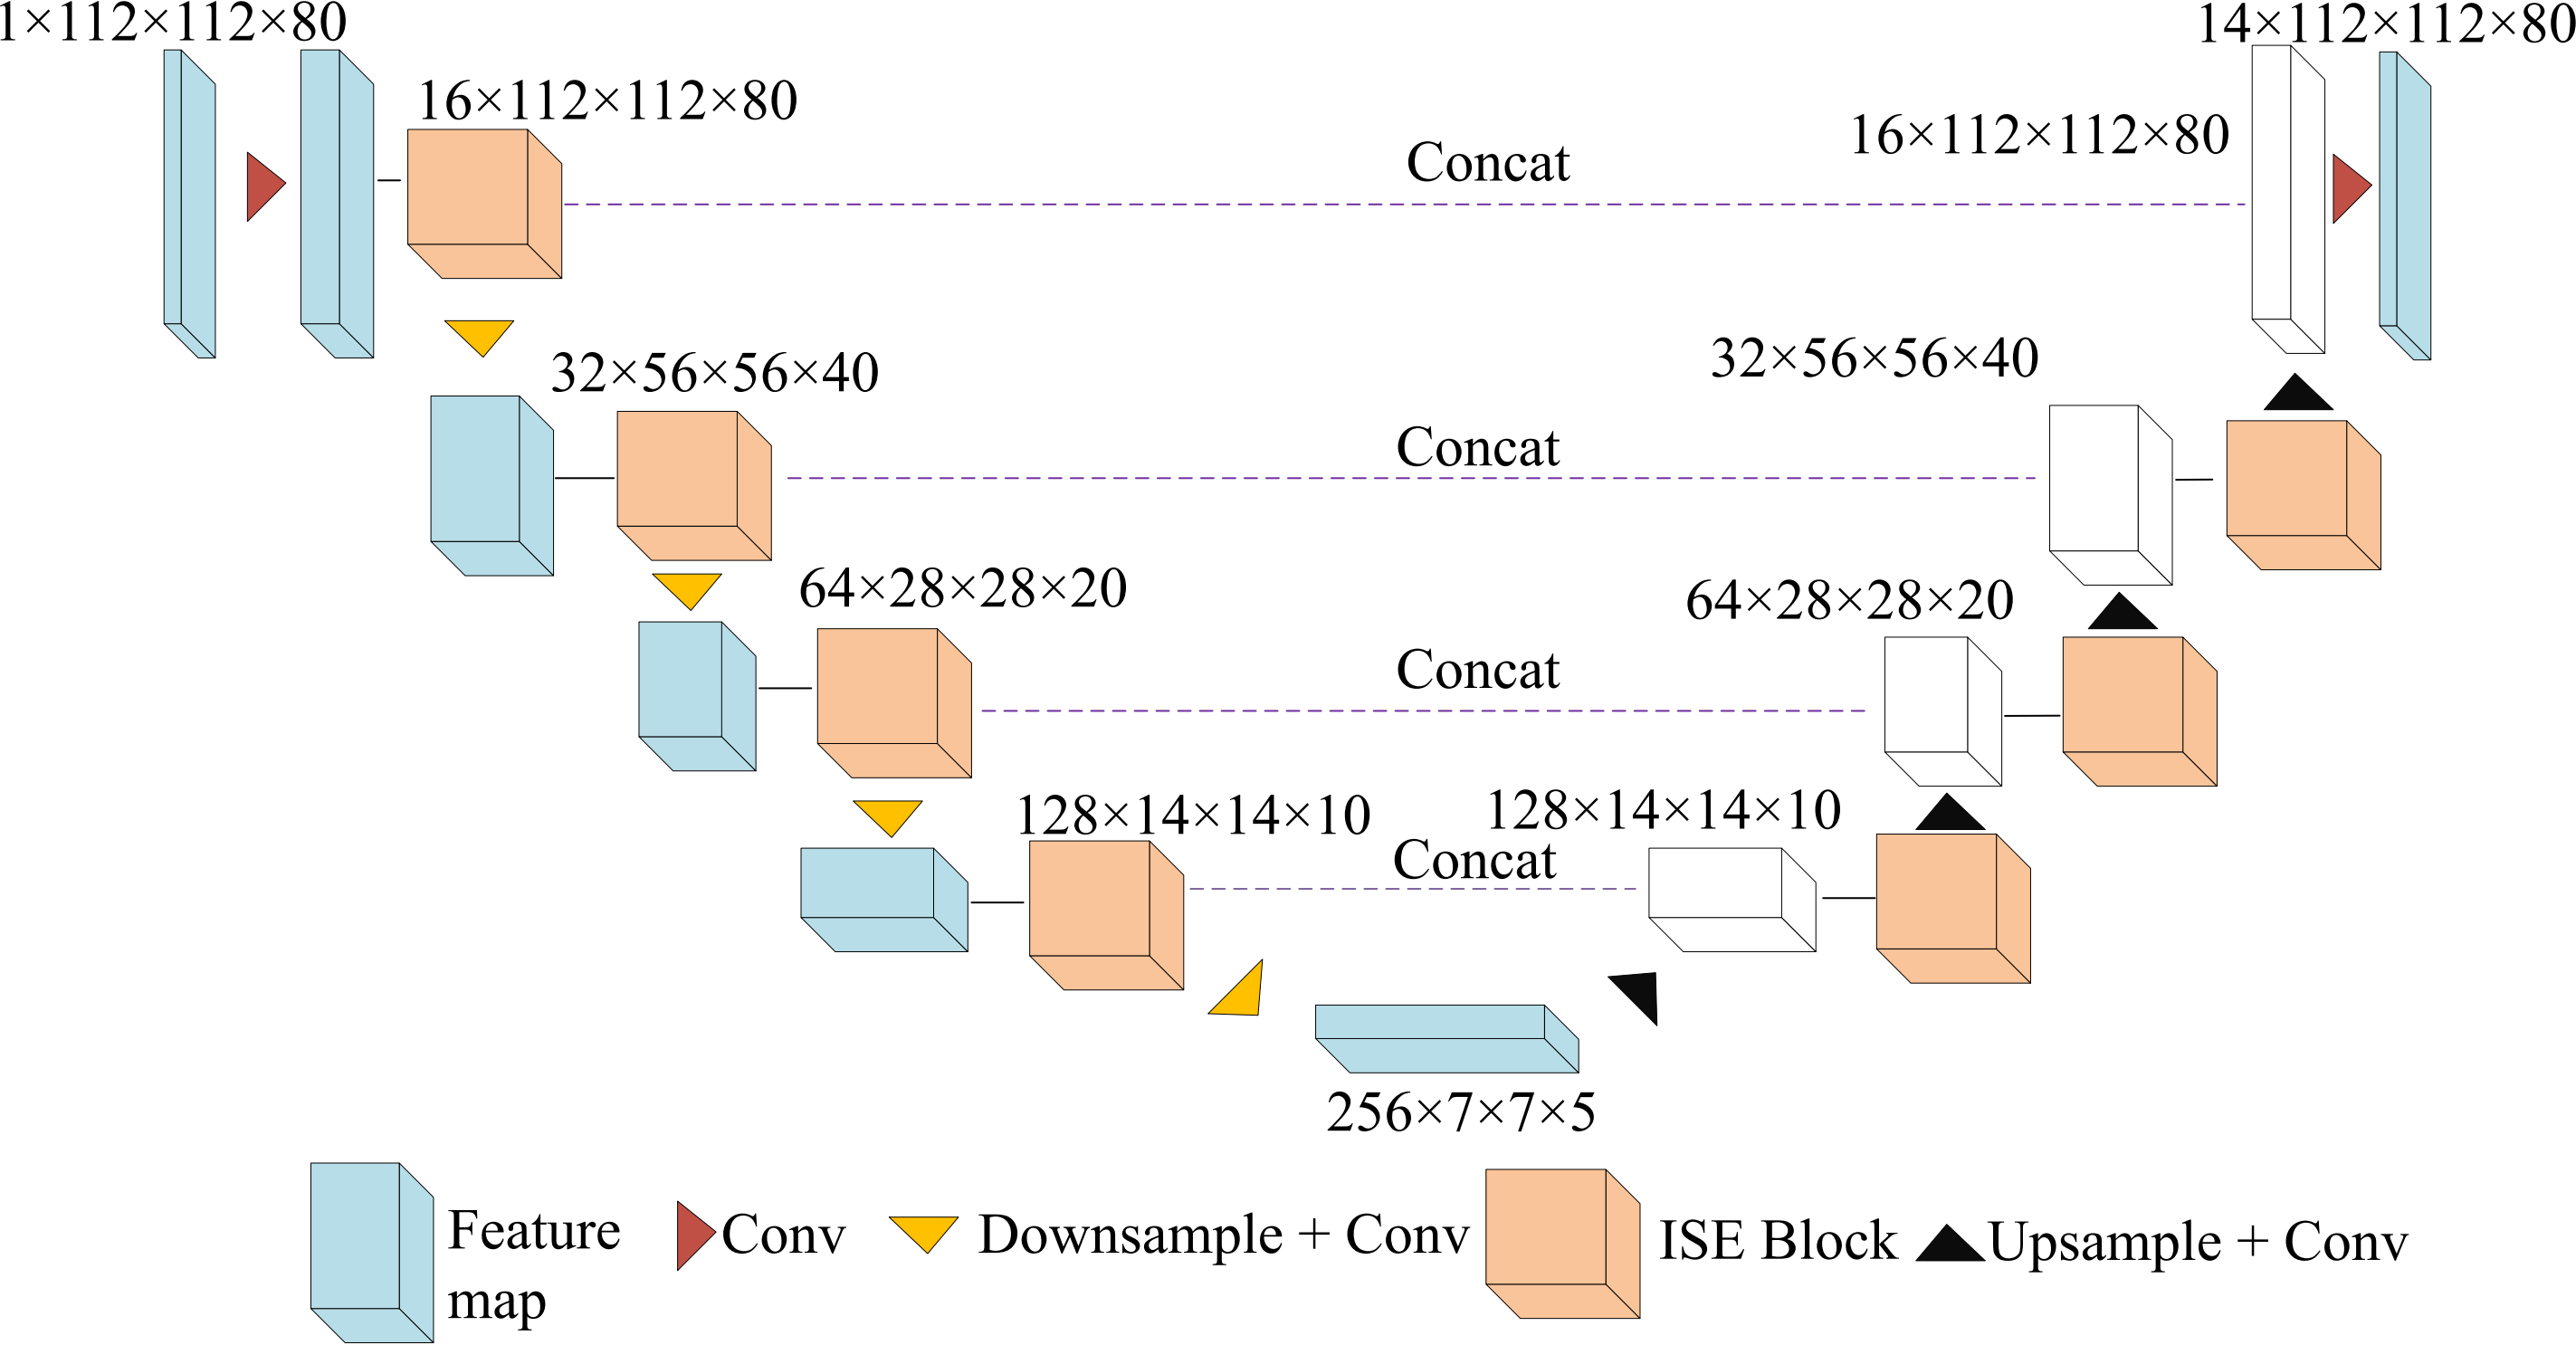

Supplement: supplementary_material [file attachment]

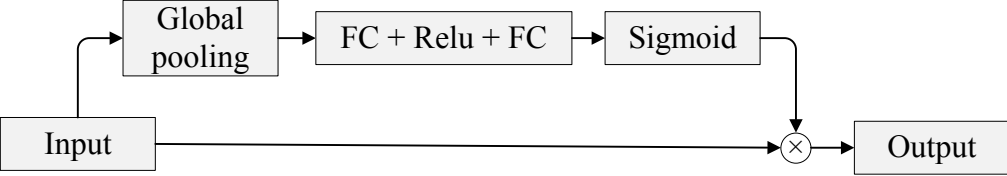

Supplement: supplementary_material [file attachment]

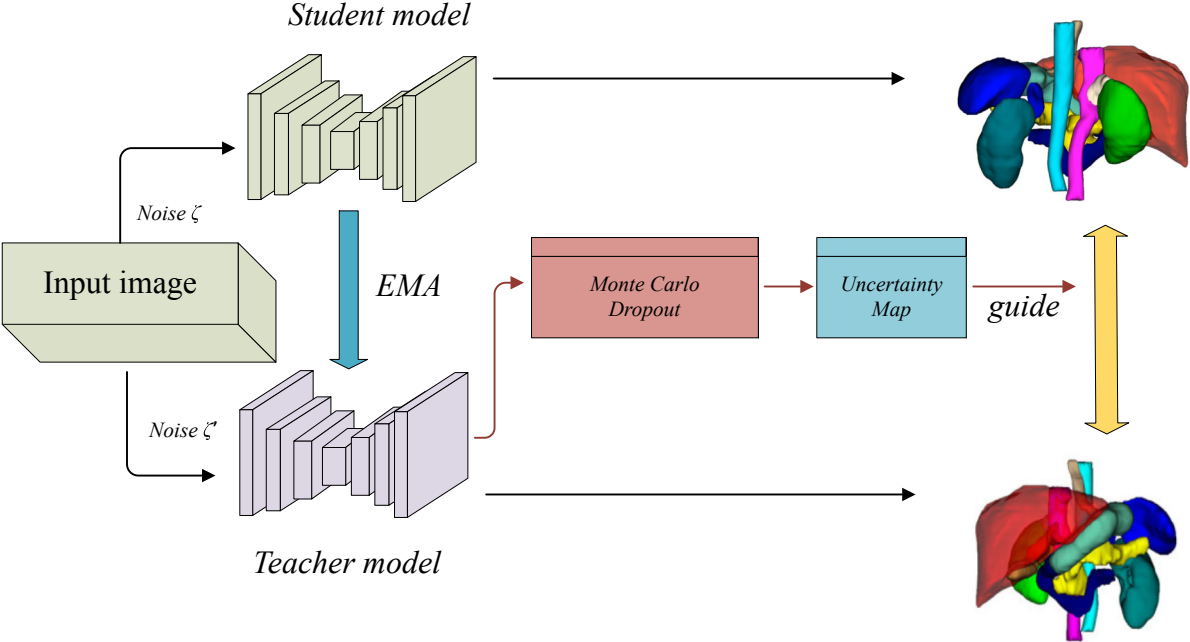

Supplement: supplementary_material [file attachment]

Case#0003

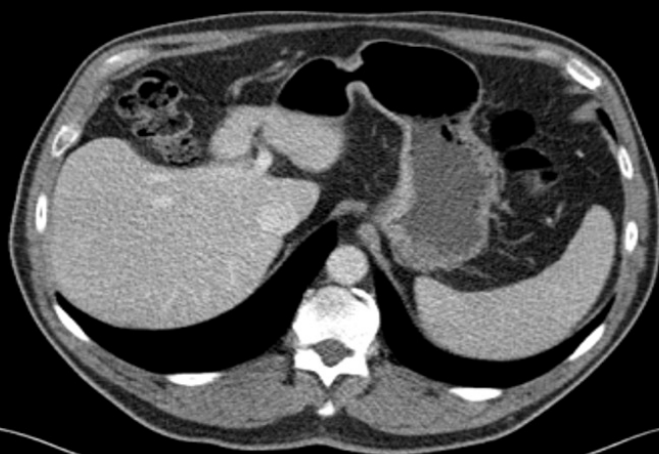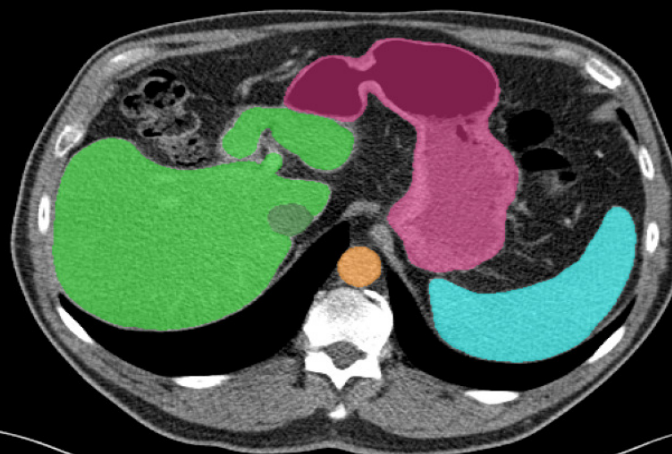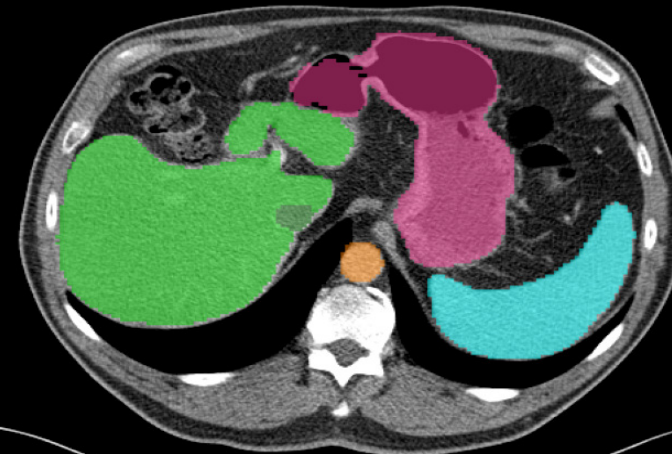

Case#0021

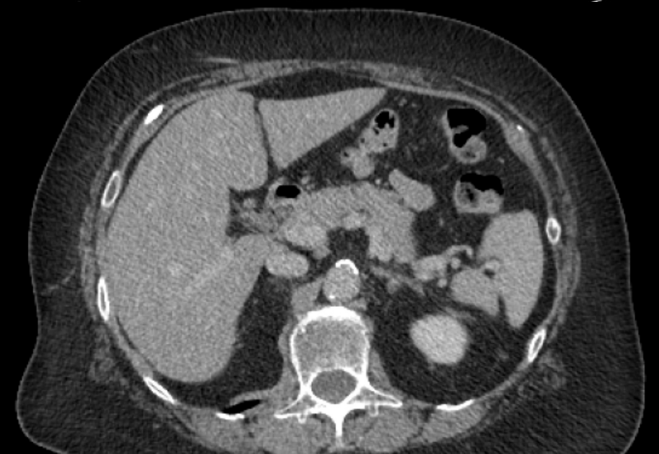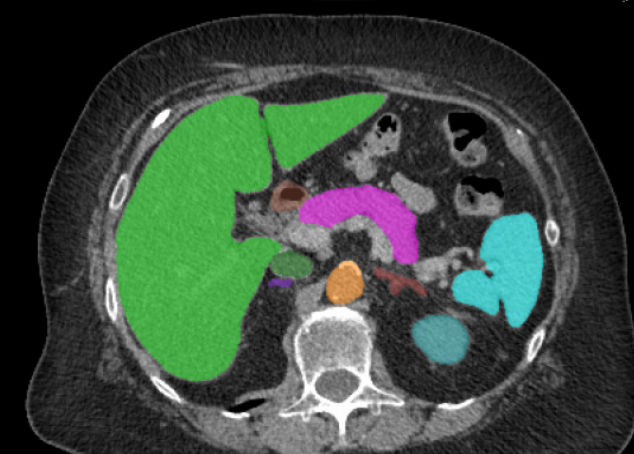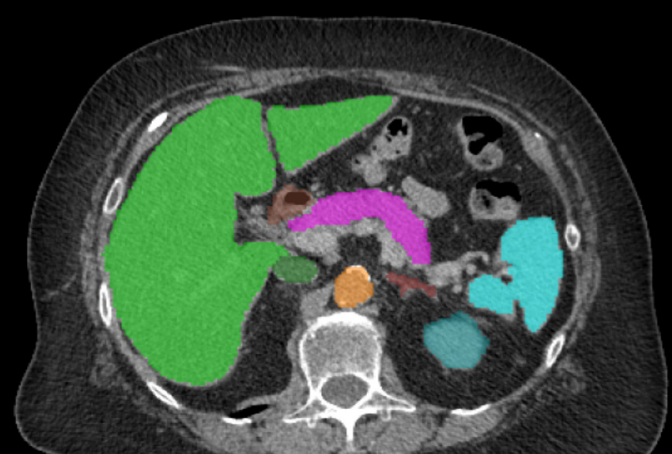

Case#0033

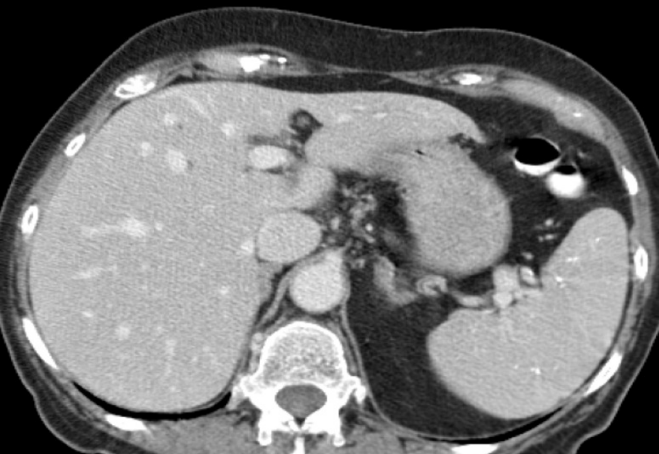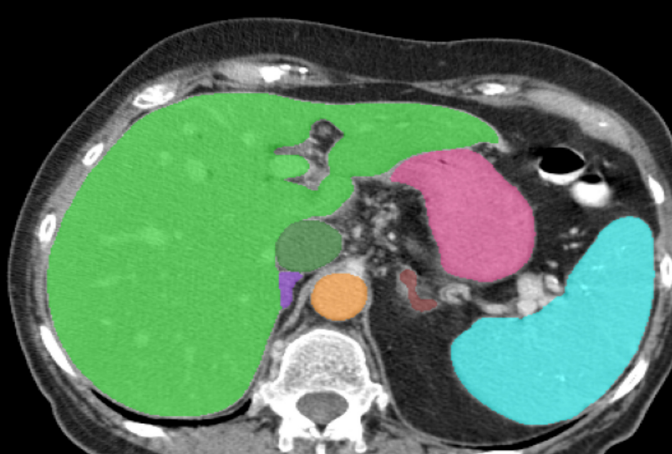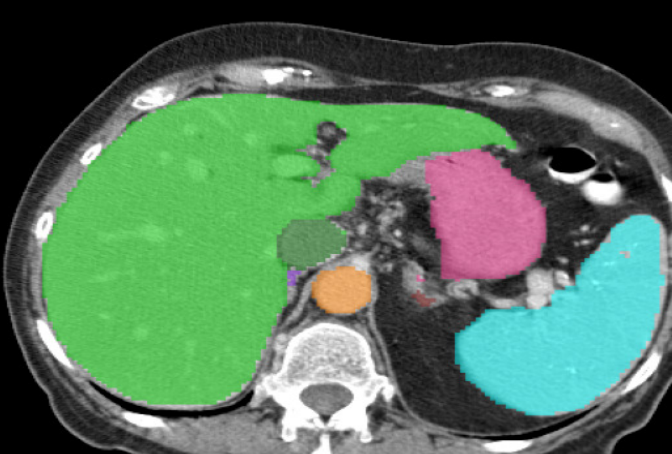

(a) image

(b) ground truth

(c) results

Supplement: supplementary_material [file attachment]

Case#0028

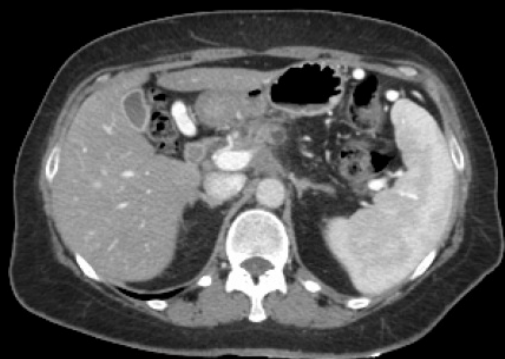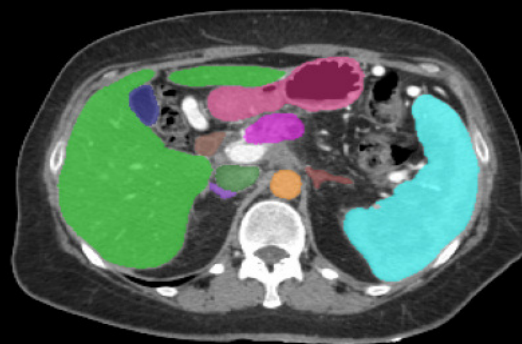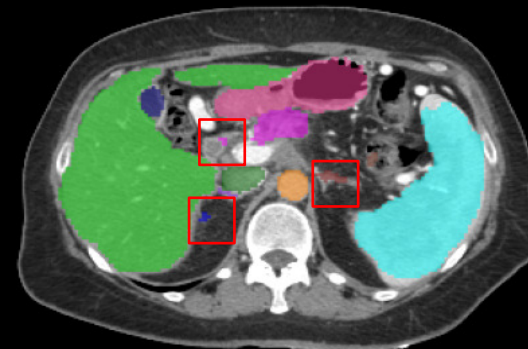

Case#0048

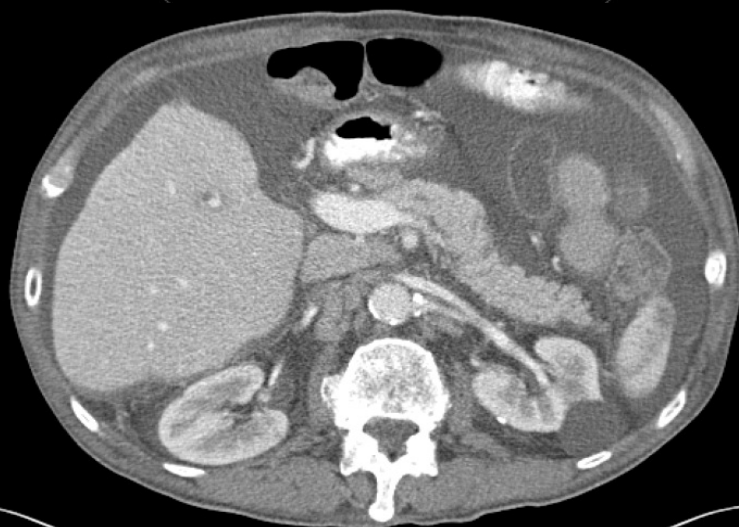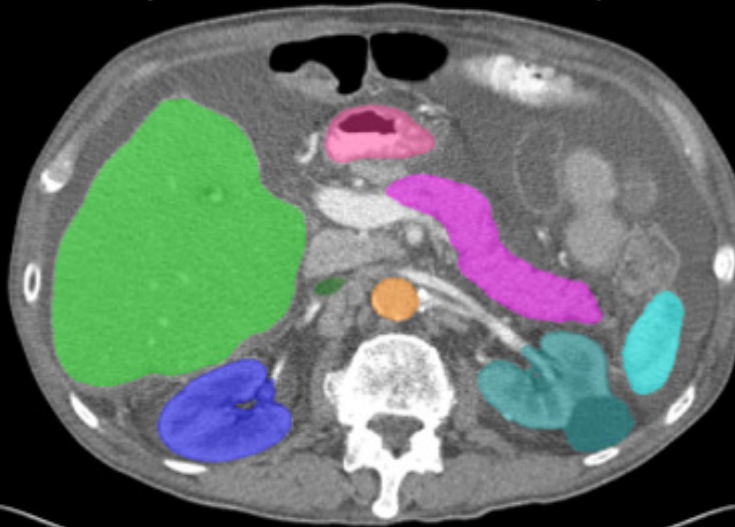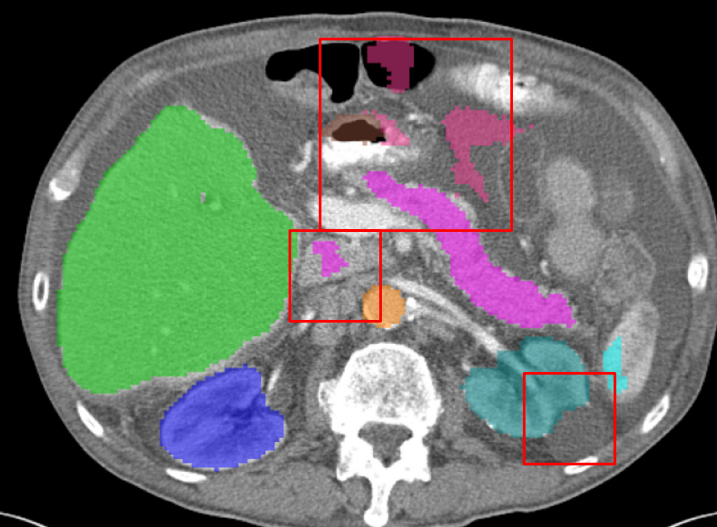

Case#0042

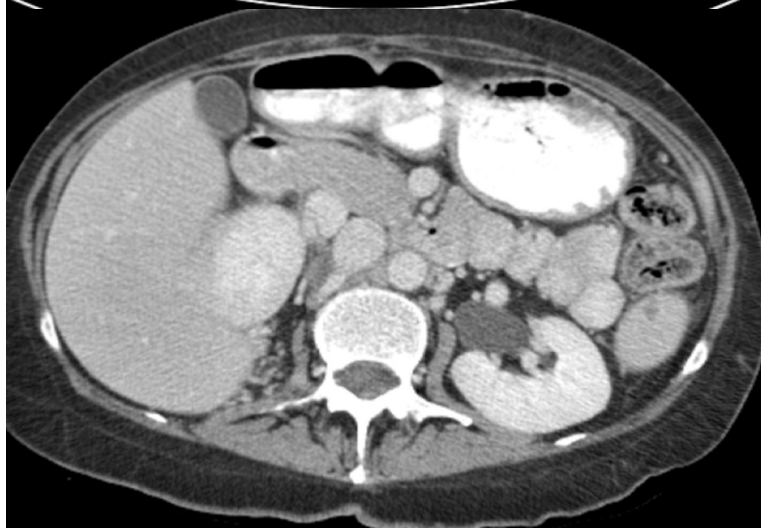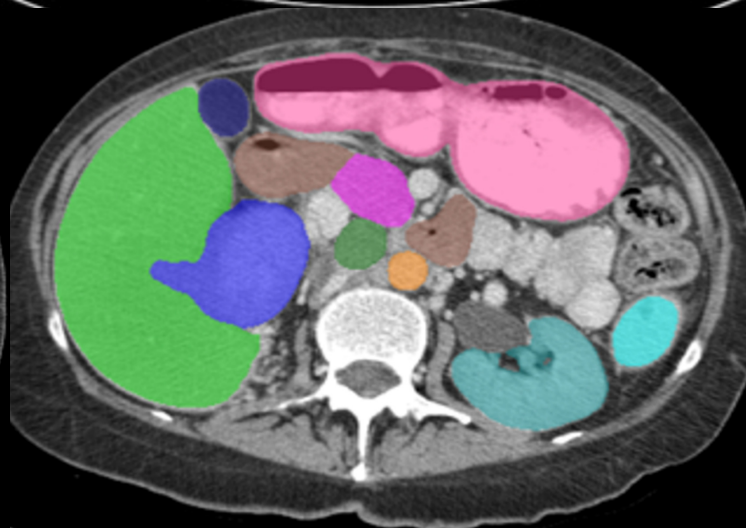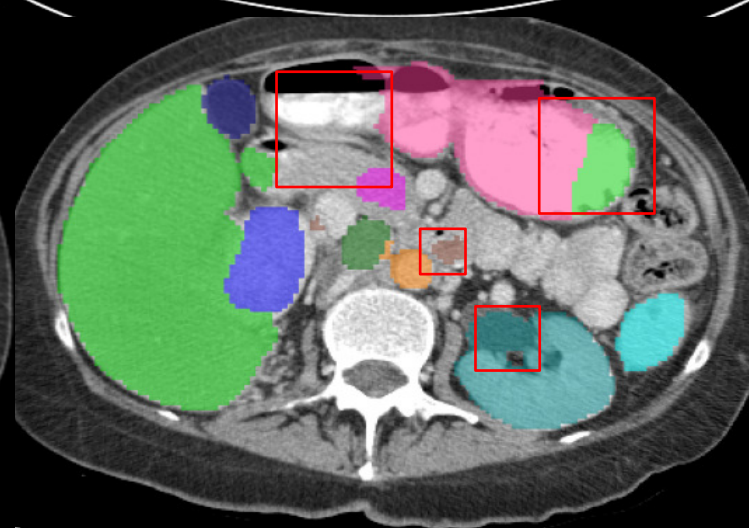

(a) image

(b) ground truth

(c) results

Supplement: supplementary_material [file attachment]
